# Supplementary material for: Structural basis for virulence regulation in Vibrio cholerae by unsaturated fatty acid components of bile
Source: PubMed Central journal article supplement (PMC6882843; doi:10.1038/s42003-019-0686-x), 2019-11-28
Supplement: 42003_2019_686_MOESM1_ESM.pdf [file 42003_2019_686_MOESM1_ESM.pdf]

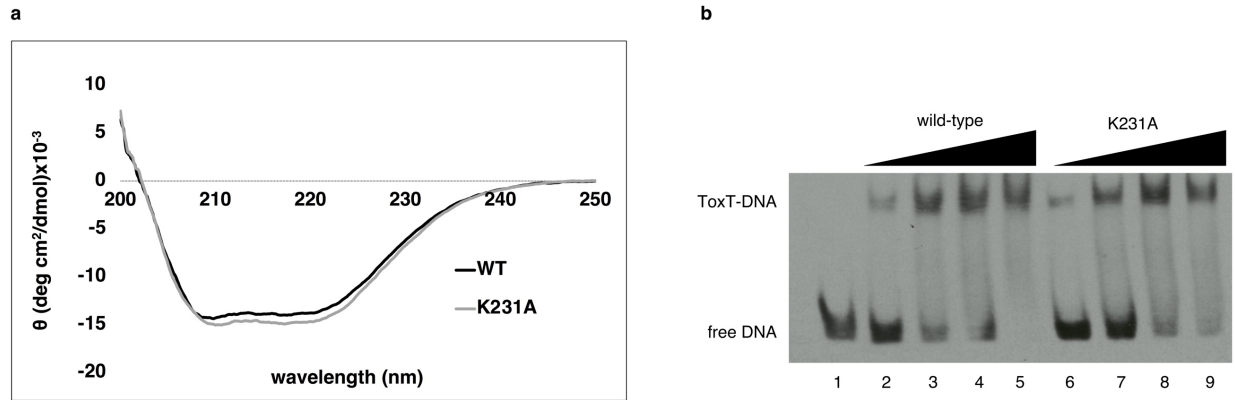

**Supplementary Figure 1.** K231A ToxT<sub>ENV256</sub> has the same secondary structure and binds DNA as well as wild-type. **a**, Circular dichroism spectra of purified wild-type (black) and K231A (gray) ToxT<sub>ENV256</sub>. **b**, Electrophoretic mobility shift assay showing the specific binding of wild-type and K231A ToxT<sub>ENV256</sub> to a DIG-labeled 84 bp segment of dsDNA containing the ToxT-binding sites from the *tcpA* promoter. All lanes contain 9 nM of DIG-labeled DNA. Lane 1, free DNA; lane 2, 0.098  $\mu$ M wild-type ToxT<sub>ENV256</sub>; lane 3, 0.195  $\mu$ M wild-type ToxT<sub>ENV256</sub>; lane 4, 0.39  $\mu$ M wild-type ToxT<sub>ENV256</sub>; lane 5, 0.78  $\mu$ M wild-type ToxT<sub>ENV256</sub>; lane 6, 0.098  $\mu$ M K231A ToxT<sub>ENV256</sub>; 7, 0.195  $\mu$ M K231A ToxT<sub>ENV256</sub>; lane 8, 0.39  $\mu$ M K231A ToxT<sub>ENV256</sub>; lane 9, 0.78  $\mu$ M K231A ToxT<sub>ENV256</sub>.

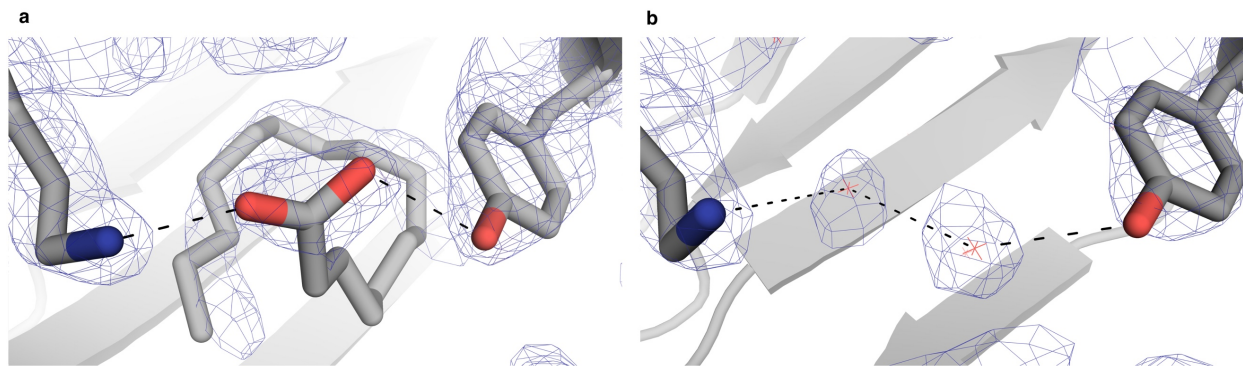

**Supplementary Figure 2.** Electron density in the UFA-binding pocket of UFA-bound and apo ToxT<sub>ENV256</sub> K231A. **a**, 2FO-FC electron density map of the UFA-binding pocket in the UFA-bound ToxT<sub>ENV256</sub> structure. Electron density is contoured to 1.5  $\sigma$ . **b**, 2FO-FC electron density map of the UFA-binding pocket in the apo ToxT<sub>ENV256</sub> structure. Electron density is contoured to 1.5  $\sigma$ .

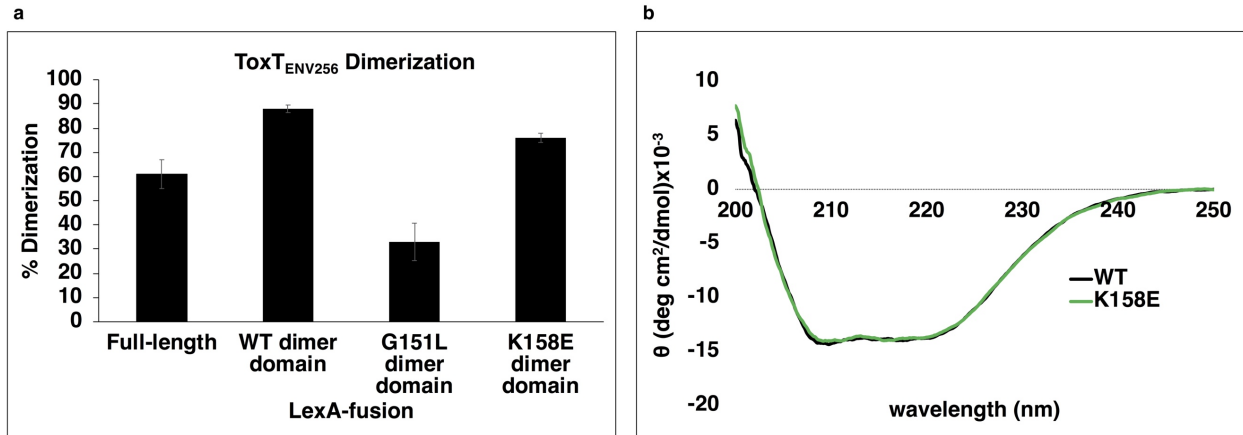

**Supplementary Figure 3.** *In vivo* Dimerization of the ToxT<sub>ENV256</sub> regulatory domain and secondary structure of purified K158E ToxT<sub>ENV256</sub>. **a**, LexA-fusion bacterial two-hybrid dimerization assay of ToxT<sub>ENV256</sub> dimer interface mutants. Error bars are of the standard deviation. **b**, Circular dichroism spectra of purified wild-type (black) and K158E (green) ToxT<sub>ENV256</sub>.

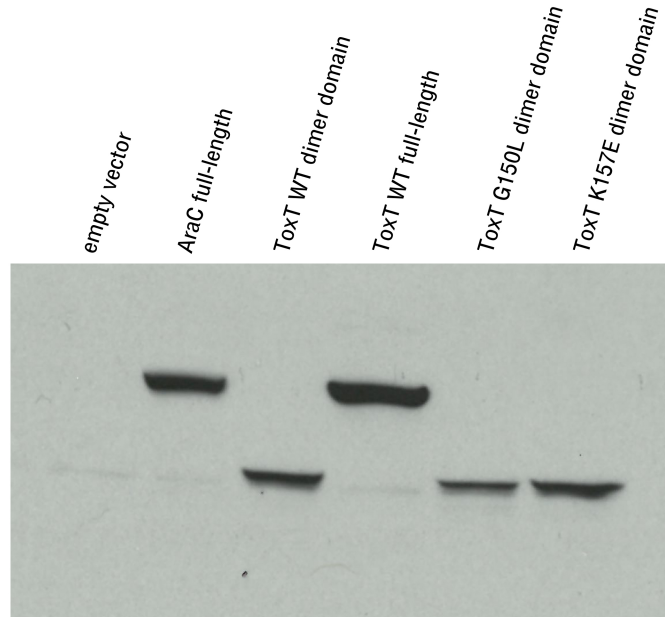

**Supplementary Figure 4.** Expression of the ToxT<sub>EPI</sub> LexA-fusions was confirmed by western blot.

LexA DNA-binding domain western blots were performed on the cell lysates of each of the *suIA-lacZ E. coli* cultures used in the  $\beta$ -galactosidase assay presented in Figure 4.

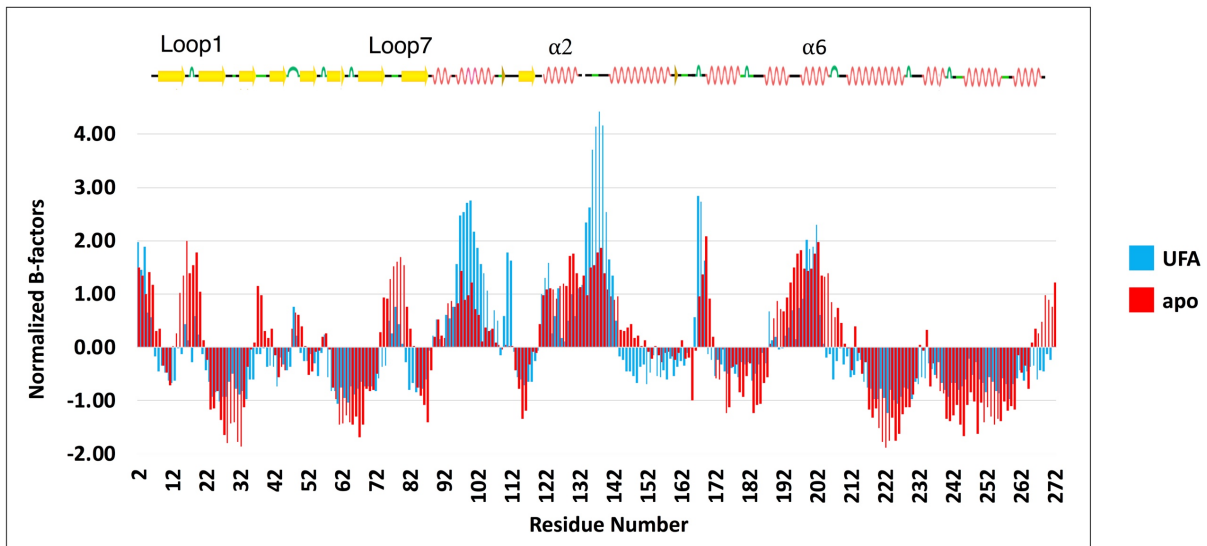

**Supplementary Figure 5.** Analysis of ToxT<sub>ENV256</sub> dynamics. Normalized crystallographic B-factors of UFA-bound (blue) and apo (red) ToxT<sub>ENV256</sub> structures. Normalized B-factors for each residue are calculated as the standard deviation from the mean B-factor of the structure. The secondary structure of ToxT is shown above aligned to the corresponding residue number.

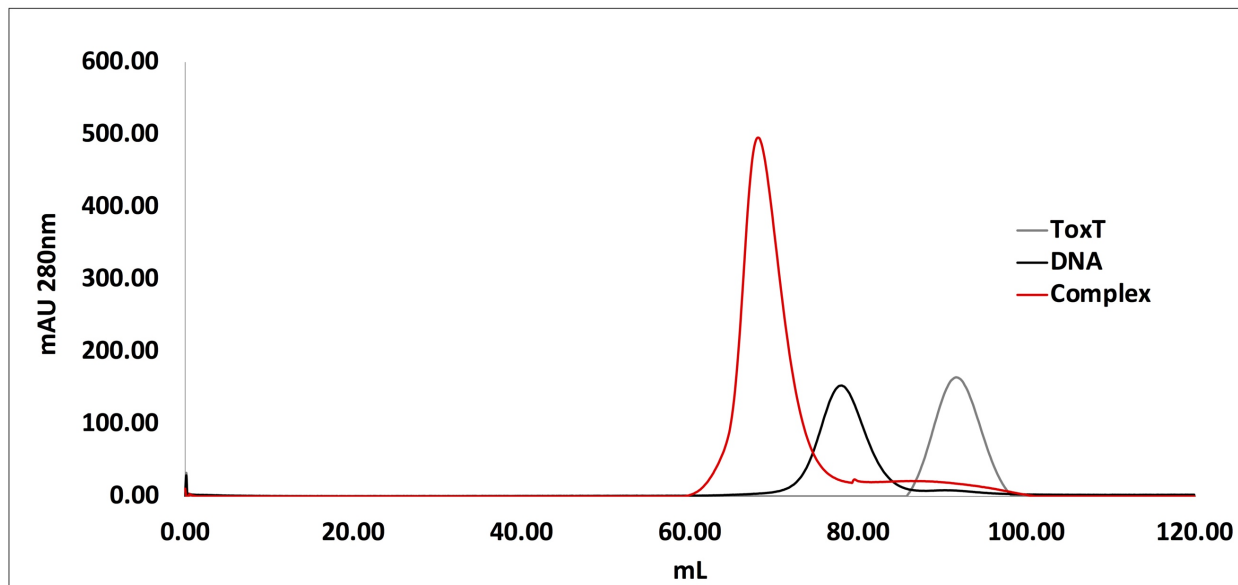

**Supplementary Figure 6.** Size Exclusion Chromatography of WT ToxT<sub>ENV256</sub>-ctx complex.

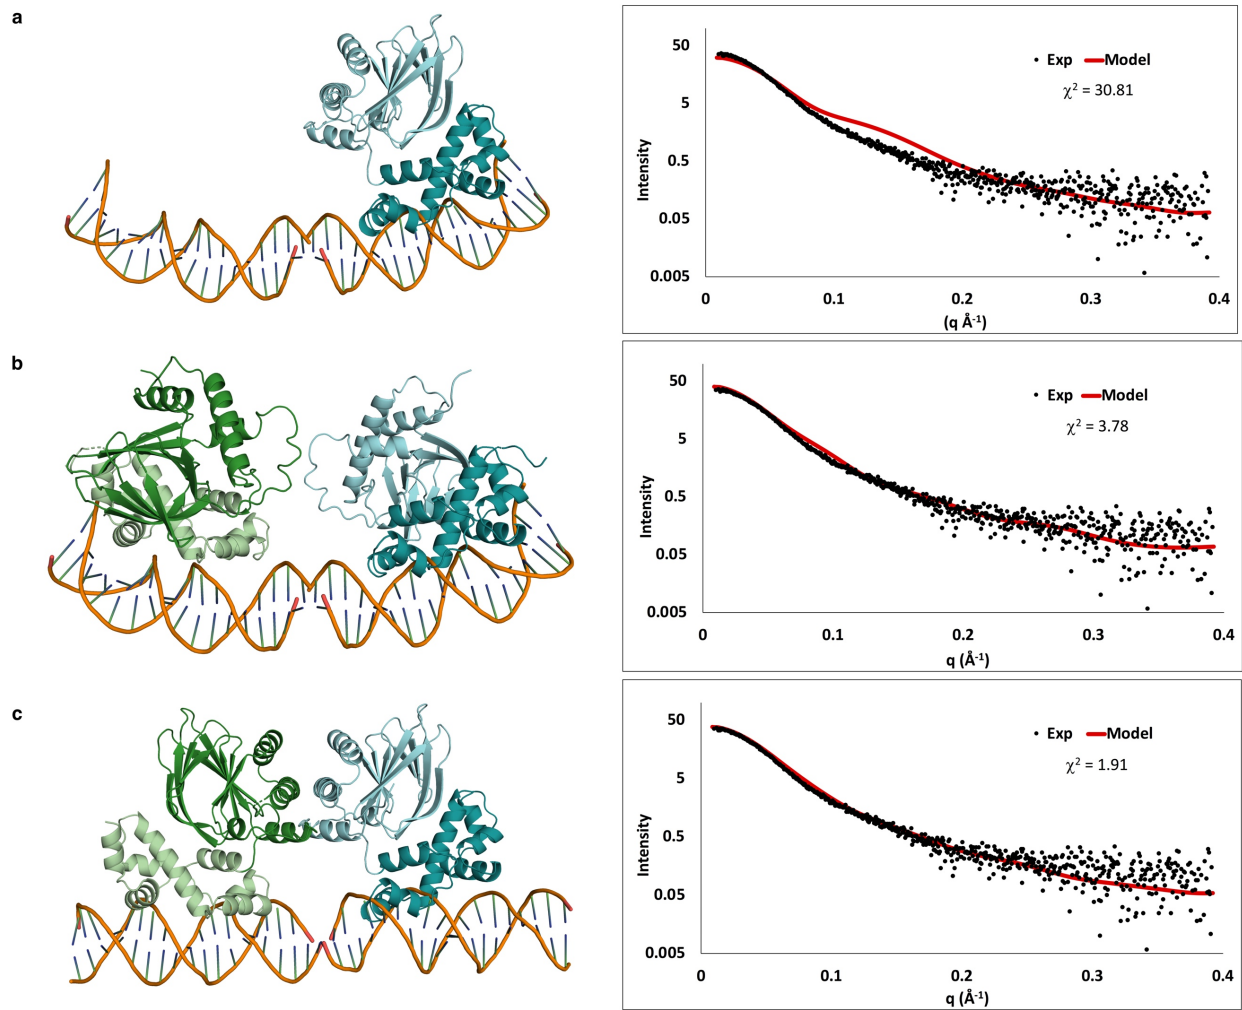

**Supplementary Figure 7.** Alternate models of the ToxT-DNA complex. Right, model, Left, calculated SAXS plot. **a**, Model of a single ToxT monomer bound to bent DNA ( $\chi^2=5.55$ ). **b**, Model of two closed ToxT monomers bound to bent DNA ( $\chi^2=1.94$ ). **c**, Model of an open ToxT dimer bound to straight DNA ( $\chi^2=1.38$ ).

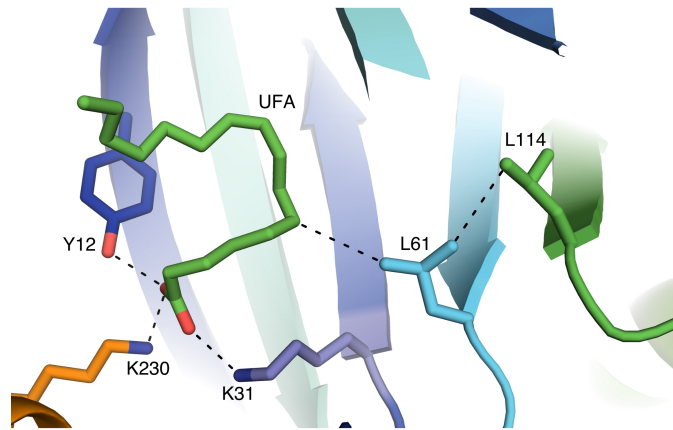

**Supplementary Figure 8.** Interactions between the unsaturated fatty acid and leucines 61 and 114 in ToxT<sub>EPI</sub>.
